# Supplementary material for: Exposure of the inner mitochondrial membrane triggers apoptotic mitophagy
Source: PubMed Central journal article supplement (PMC10923902; doi:10.1038/s41418-024-01260-2), 2024-02-23

**Figure 1B**

|         |   |   |   |   |   |   |   |   |   |   |
|---------|---|---|---|---|---|---|---|---|---|---|
| DMSO    | 4 | 8 | - | - | - | - | - | - | - | - |
| ABT-737 | - | - | 4 | 8 | - | - | 4 | 8 | - | - |
| QVD-OPh | - | - | - | - | 4 | 8 | 4 | 8 | - | - |
| FCCP    | - | - | - | - | - | - | - | - | 2 | 4 |

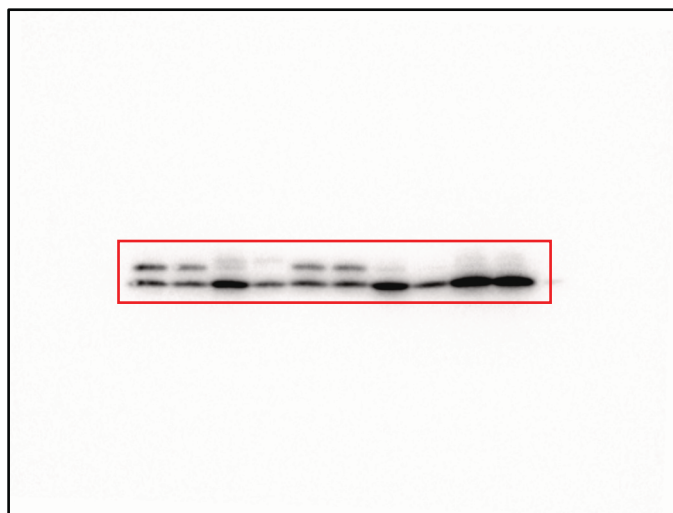

LC3B

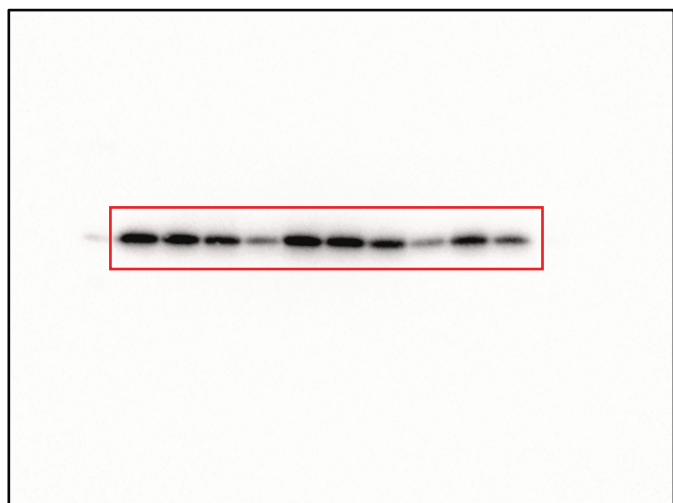

TOMM20

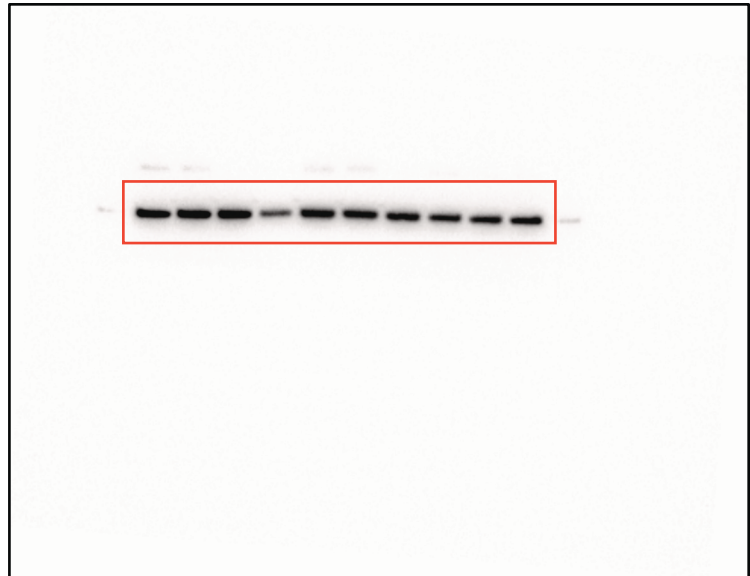

$\beta$ -ACTIN

Figure 5B

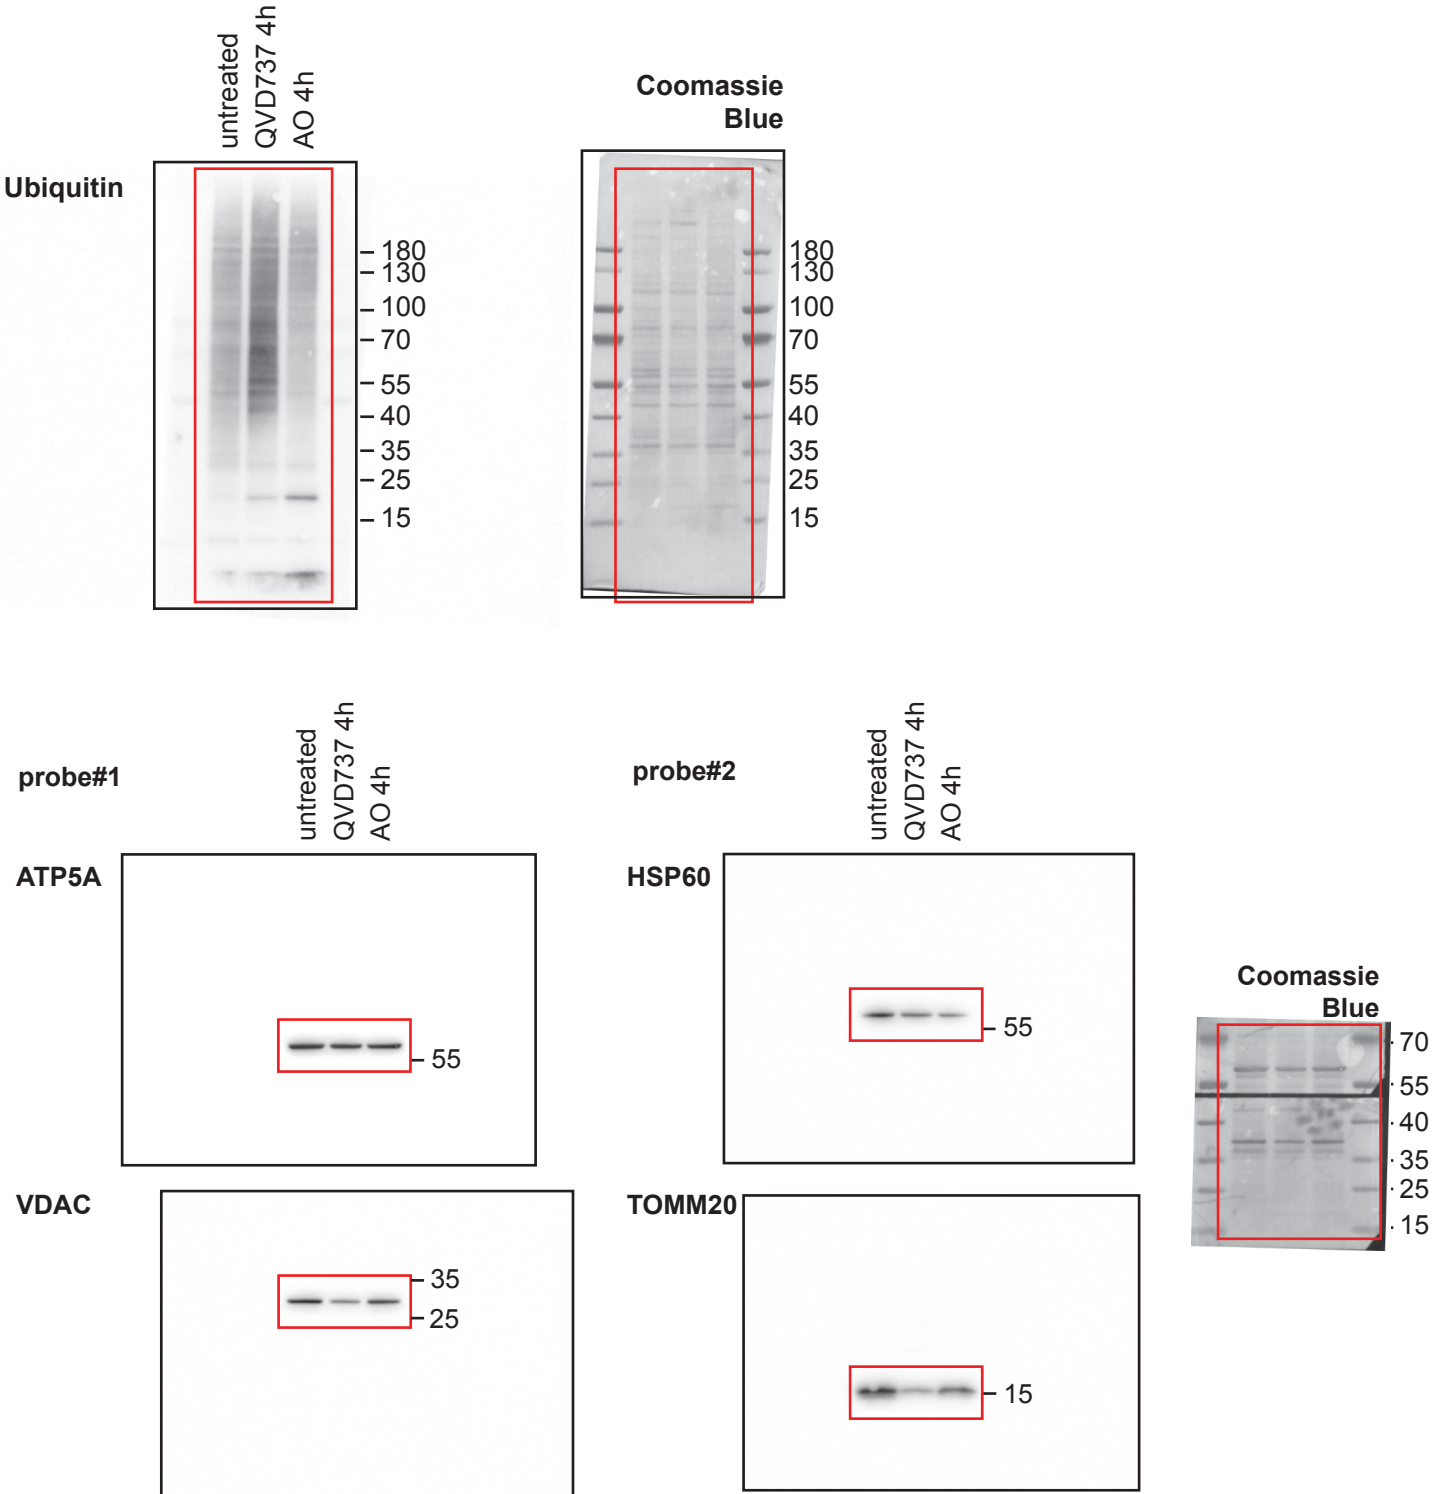

**Figure S1A**

|         | <i>Mcl1</i> <sup>-/-</sup> |   |   |   |   |   |   |   | <i>Bax</i> <sup>-/-</sup> <i>Bak</i> <sup>-/-</sup> <i>Mcl1</i> <sup>-/-</sup> |   |   |   |   |   |   |   |
|---------|----------------------------|---|---|---|---|---|---|---|--------------------------------------------------------------------------------|---|---|---|---|---|---|---|
| DMSO    | 4                          | 8 | - | - | - | - | - | - | 4                                                                              | 8 | - | - | - | - | - | - |
| FCCP    | -                          | - | - | - | - | - | - | - | 2                                                                              | - | - | - | - | - | - | 2 |
| QVD-OPh | -                          | - | - | 4 | 8 | 4 | 8 | - | -                                                                              | - | - | - | 4 | 8 | 4 | 8 |
| ABT-737 | -                          | - | 4 | 8 | - | - | 4 | 8 | -                                                                              | - | 4 | 8 | - | - | 4 | 8 |

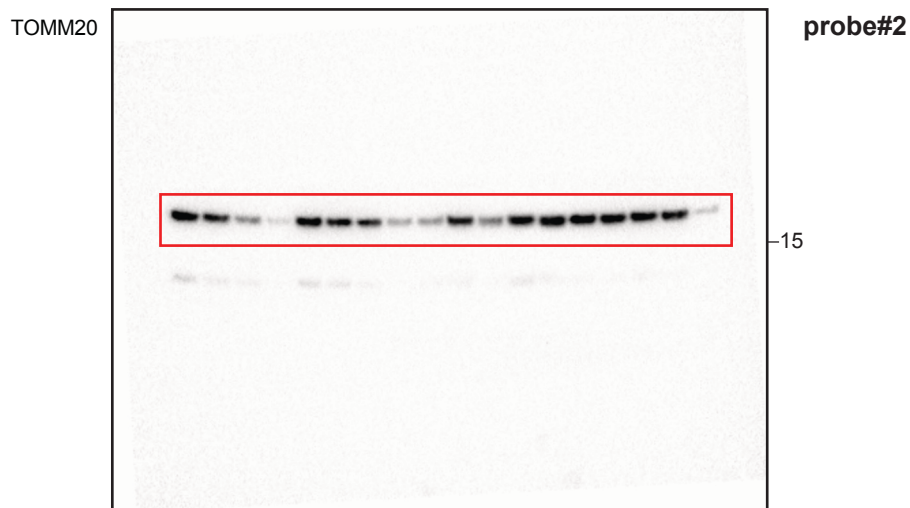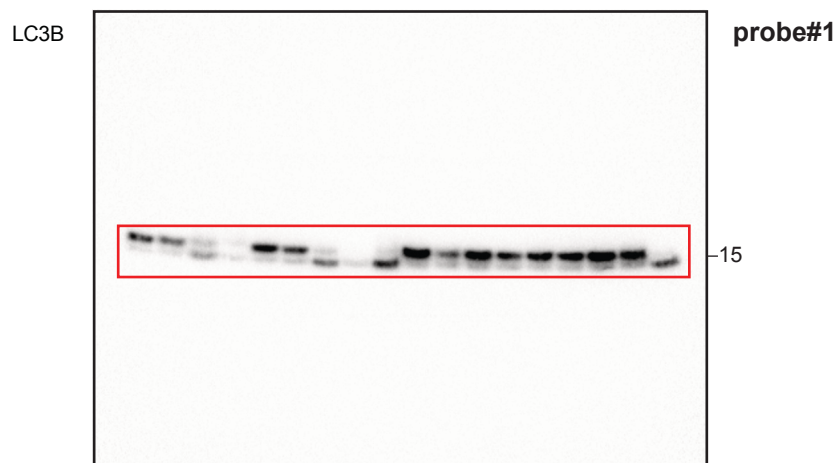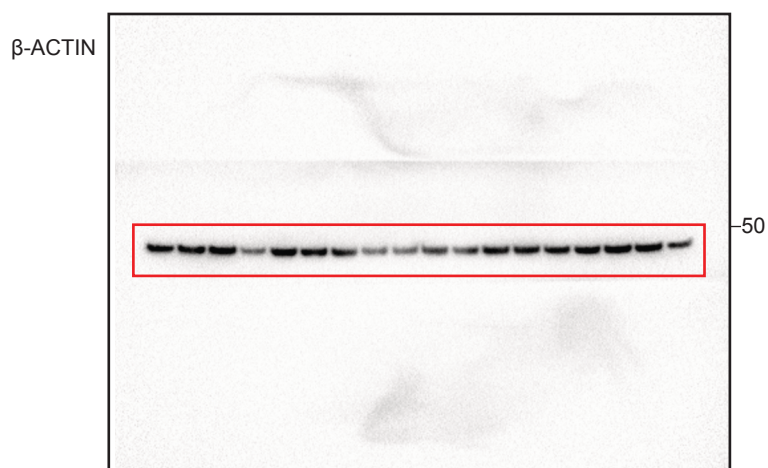

Figure S2H

Mcl1<sup>-/-</sup>  
Sting<sup>-/-</sup> Mcl1<sup>-/-</sup>

STING

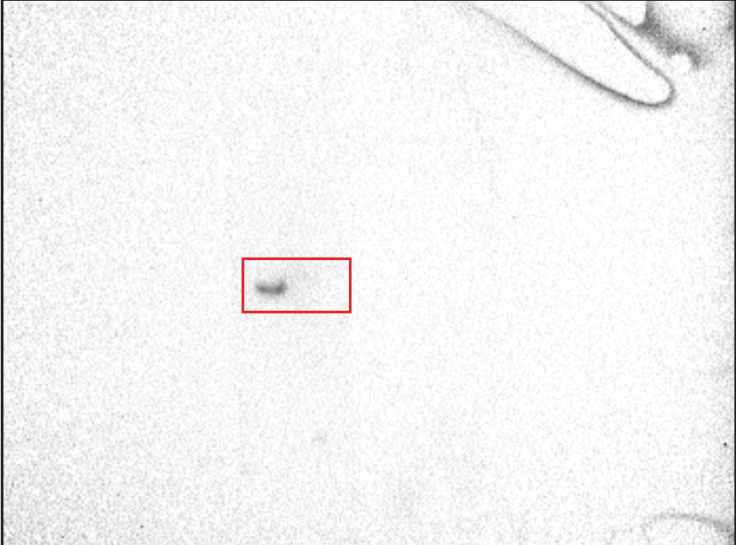

β-ACTIN

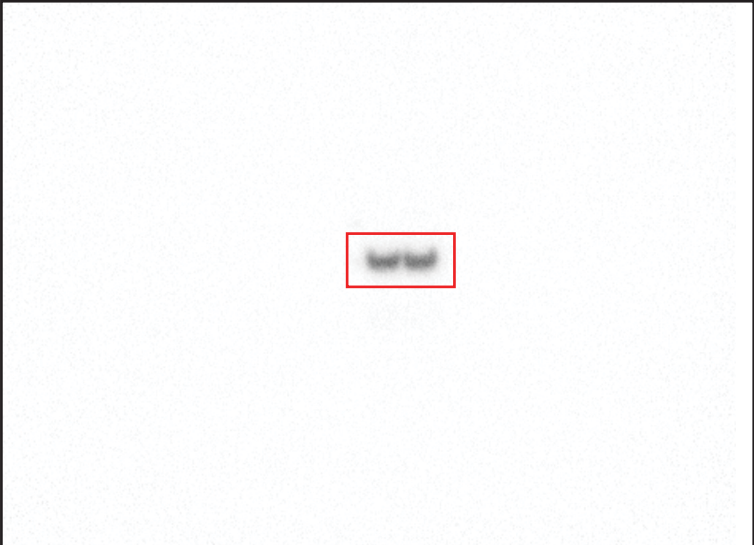



Figure S3A

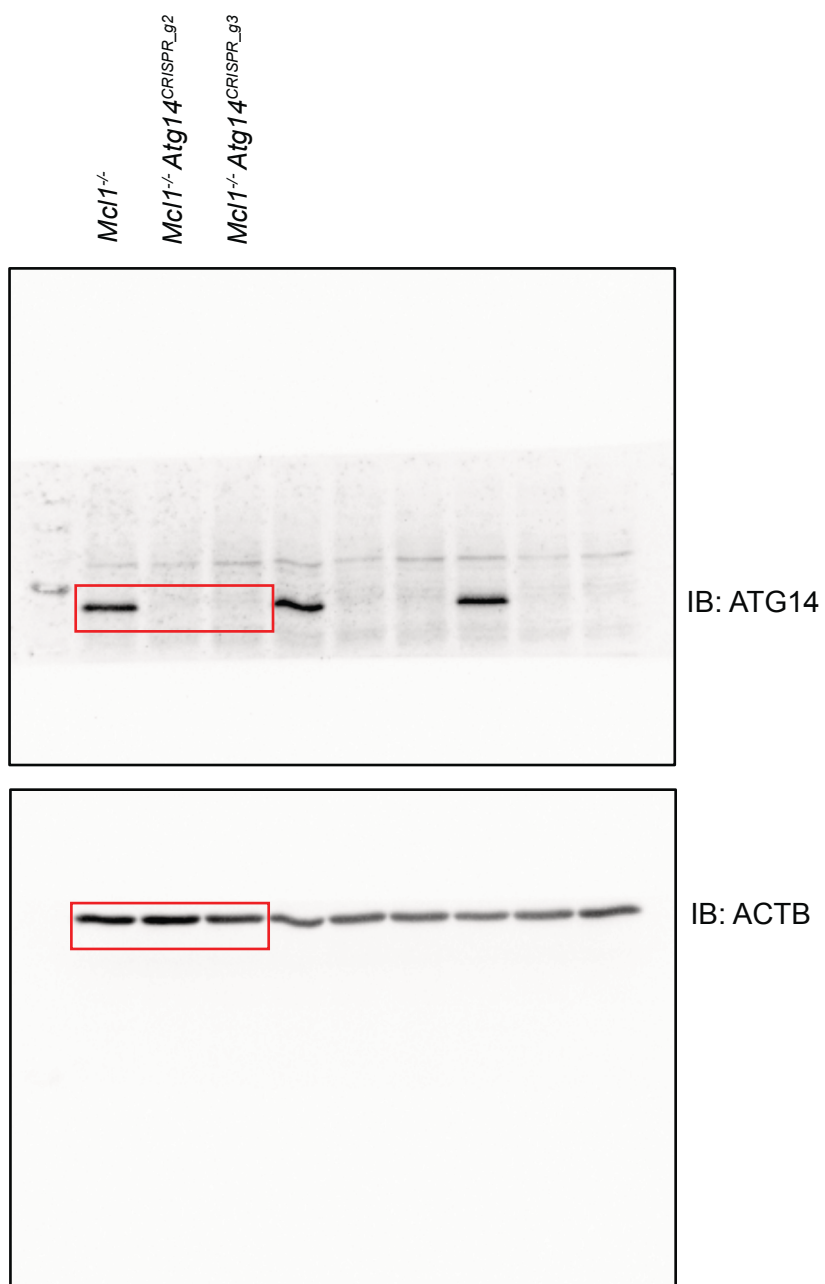

**Figure S3B**

|         | <i>Mcl1</i> <sup>-/-</sup> |   |   | <i>Mcl1</i> <sup>-/-</sup><br><i>Atg14</i> <sup>CRISPR_g2</sup> |   |   | <i>Mcl1</i> <sup>-/-</sup><br><i>Atg14</i> <sup>CRISPR_g3</sup> |   |   |
|---------|----------------------------|---|---|-----------------------------------------------------------------|---|---|-----------------------------------------------------------------|---|---|
| EBSS    | -                          | + | + | -                                                               | + | + | -                                                               | + | + |
| Baf. A1 | -                          | - | + | -                                                               | - | + | -                                                               | - | + |

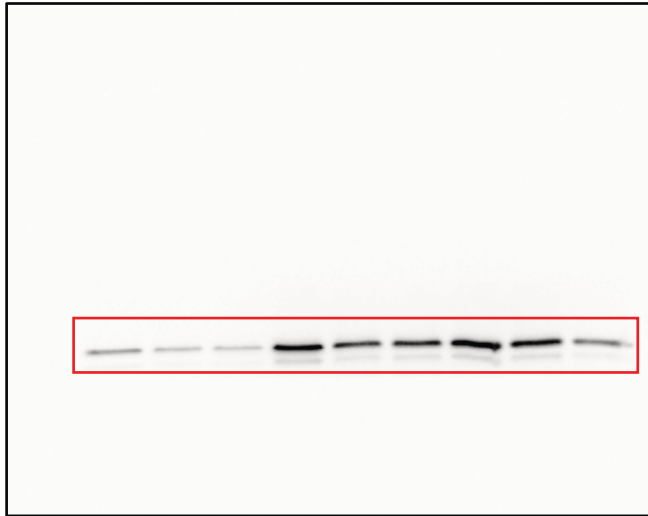

IB: p62

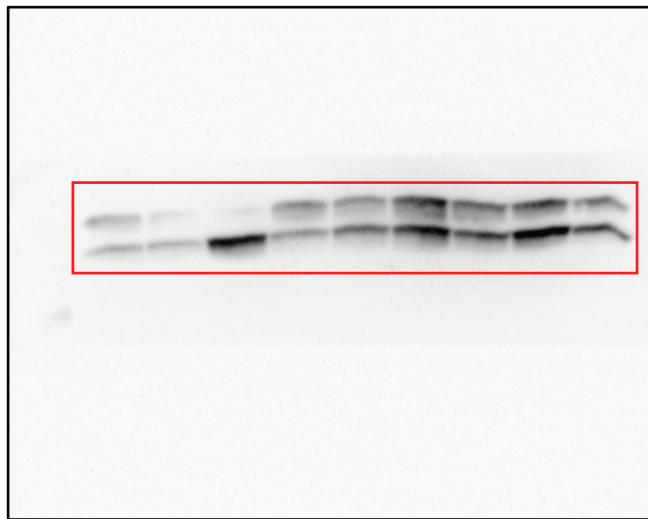

IB: LC3B

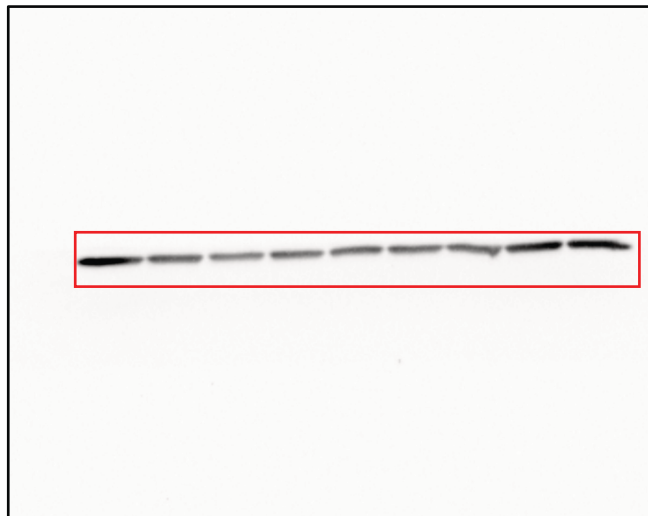

IB: ACTB

Figure S3E

*Mcl1*<sup>-/-</sup>  
*Mcl1*<sup>-/-</sup> *Fip200*<sup>CRISPR\_g1</sup>  
*Mcl1*<sup>-/-</sup> *Fip200*<sup>CRISPR\_g3</sup>

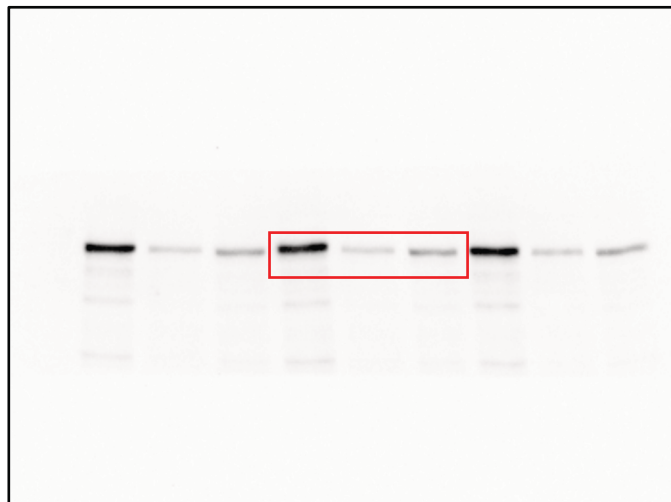

IB: FIP200

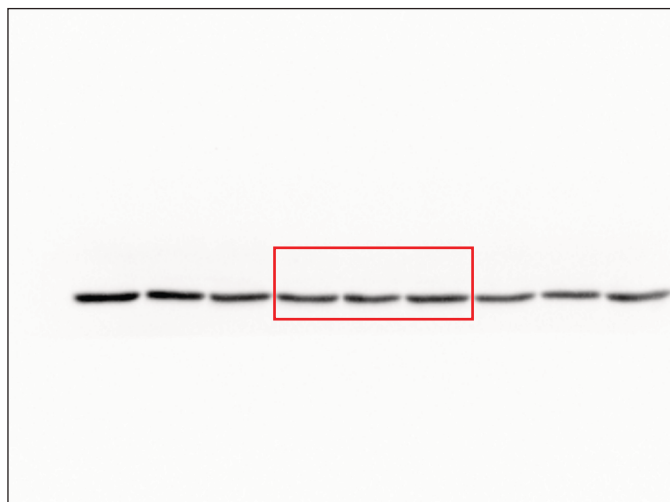

IB: ACTB

**Figure S3F**

|         | <i>Mcl1</i> <sup>-/-</sup> |   |   | <i>Mcl1</i> <sup>-/-</sup><br><i>Fip200</i> <sup>CRISPR_g1</sup> |   |   | <i>Mcl1</i> <sup>-/-</sup><br><i>Fip200</i> <sup>CRISPR_g3</sup> |   |   |
|---------|----------------------------|---|---|------------------------------------------------------------------|---|---|------------------------------------------------------------------|---|---|
| EBSS    | -                          | + | + | -                                                                | + | + | -                                                                | + | + |
| Baf. A1 | -                          | - | + | -                                                                | - | + | -                                                                | - | + |

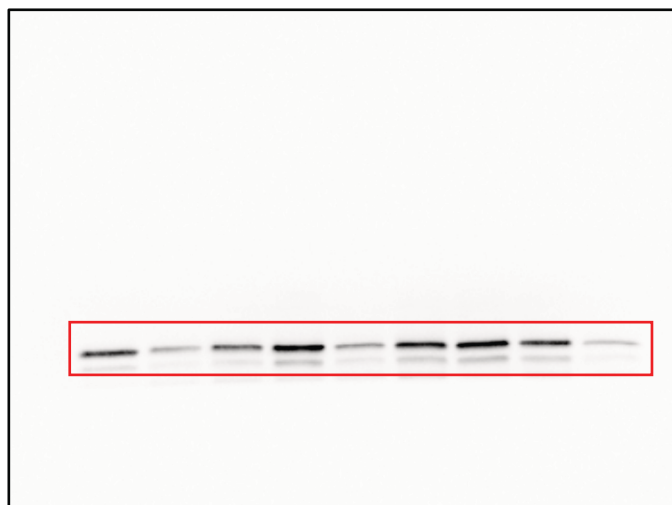

IB: p62

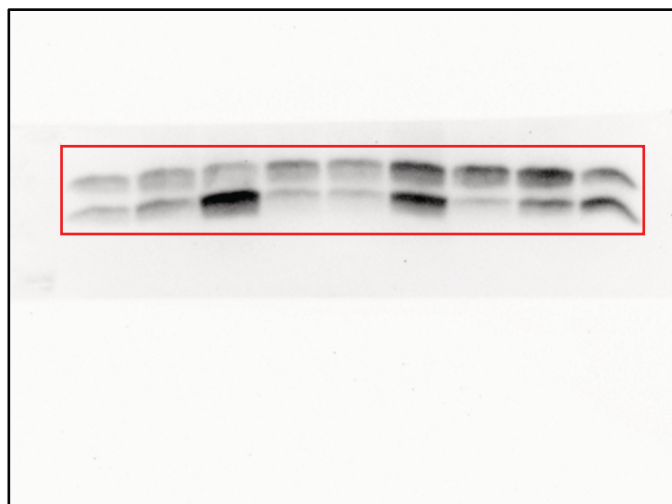

IB: LC3B

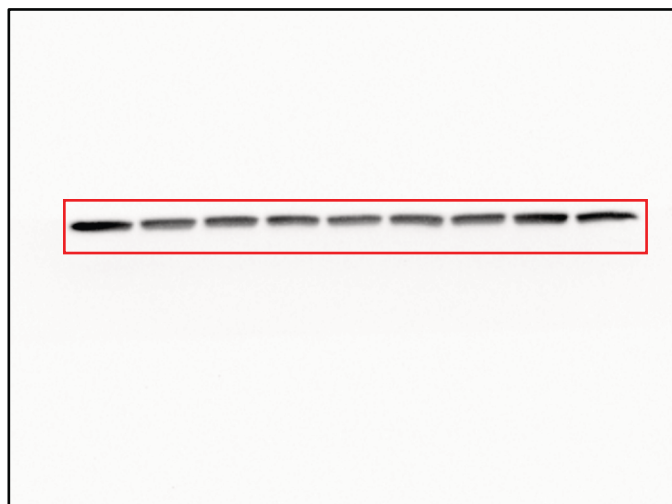

IB: ACTB

Figure S4A

Wildtype  
ATG3<sup>-/-</sup>

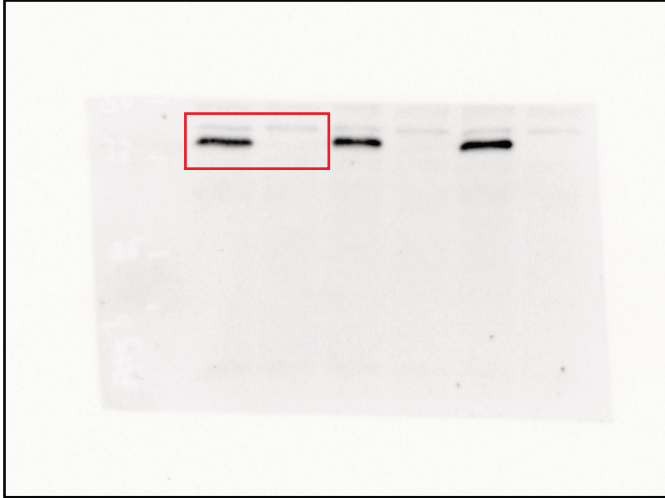

IB: ATG3

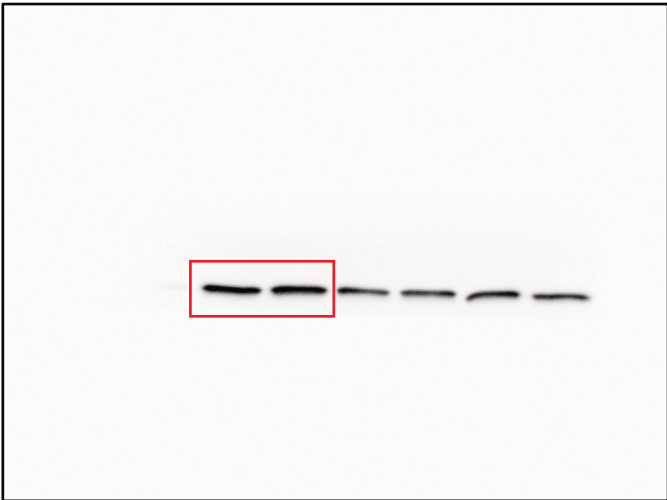

IB: HSP60



**Figure S4B**

| Wildtype |   |   | <i>ATG3</i> <sup>-/-</sup> |   |   |        |
|----------|---|---|----------------------------|---|---|--------|
| -        | + | + | -                          | + | + | EBSS   |
| -        | - | + | -                          | - | + | Baf A1 |

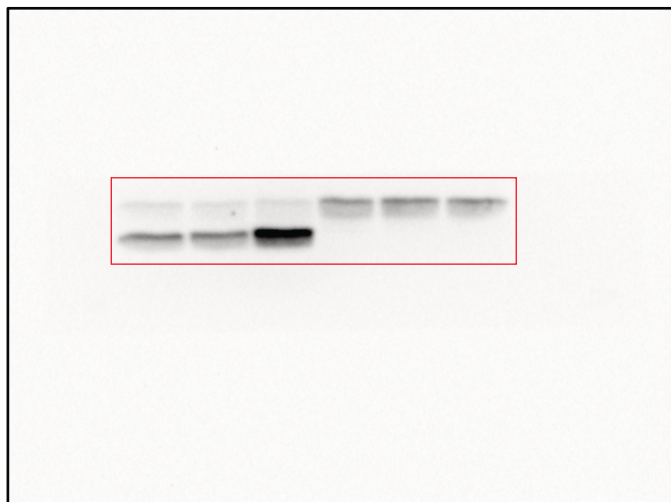

IB: LC3B

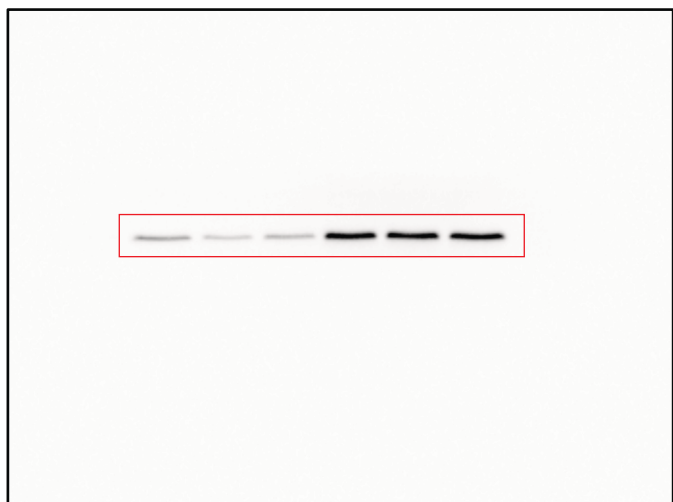

IB: p62

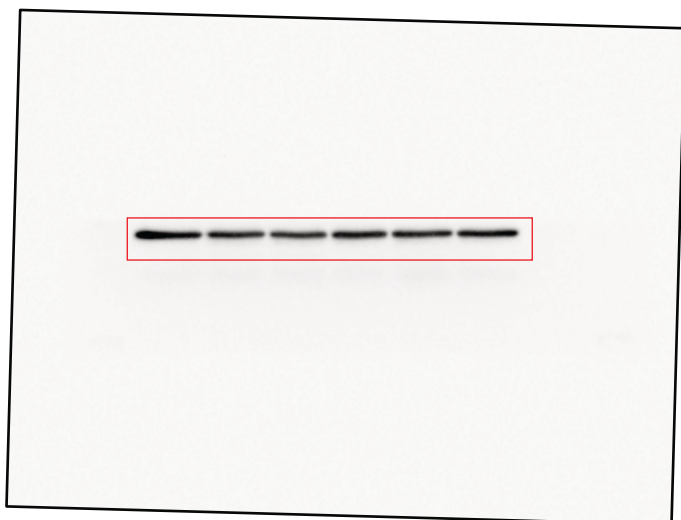

IB: ACTB

Figure S4D

Wildtype  
ATG5<sup>-/-</sup>  
ATG7<sup>-/-</sup>

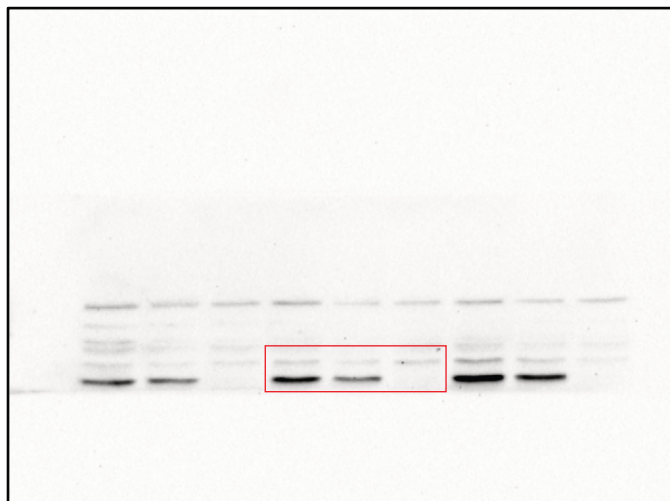

IB: ATG7

Wildtype  
ATG5<sup>-/-</sup>  
ATG7<sup>-/-</sup>

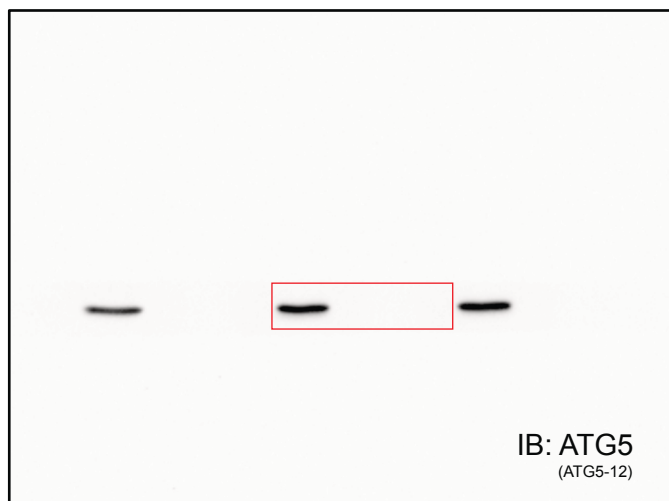

IB: ATG5  
(ATG5-12)

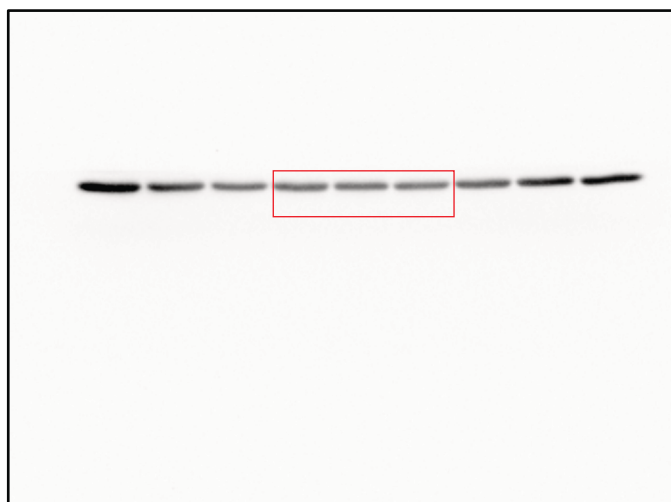

IB: ACTB

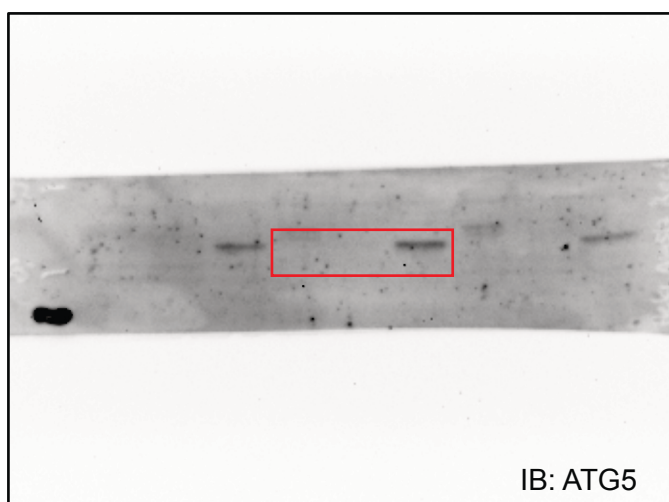

IB: ATG5

**Figure S4E**

| Wildtype |   |   | <i>ATG5</i> <sup>-/-</sup> |   |   | <i>ATG7</i> <sup>-/-</sup> |   |   |        |
|----------|---|---|----------------------------|---|---|----------------------------|---|---|--------|
| -        | + | + | -                          | + | + | -                          | + | + | EBSS   |
| -        | - | + | -                          | - | + | -                          | - | + | Baf A1 |

| Wildtype |   |   | <i>ATG5</i> <sup>-/-</sup> |   |   | <i>ATG7</i> <sup>-/-</sup> |   |   |        |
|----------|---|---|----------------------------|---|---|----------------------------|---|---|--------|
| -        | + | + | -                          | + | + | -                          | + | + | EBSS   |
| -        | - | + | -                          | - | + | -                          | - | + | Baf A1 |

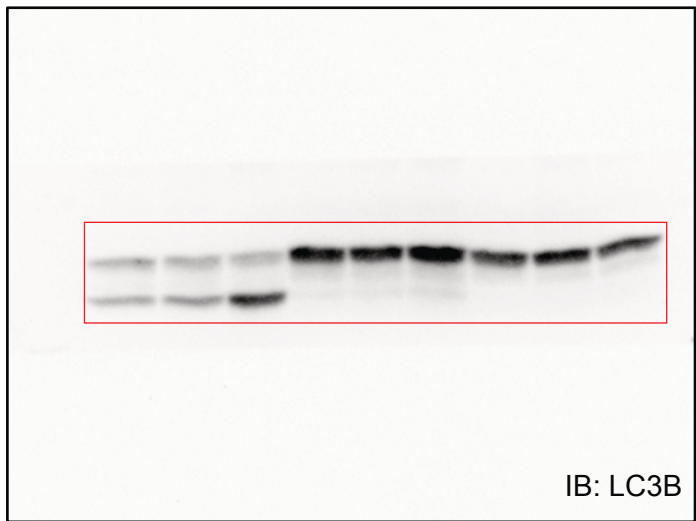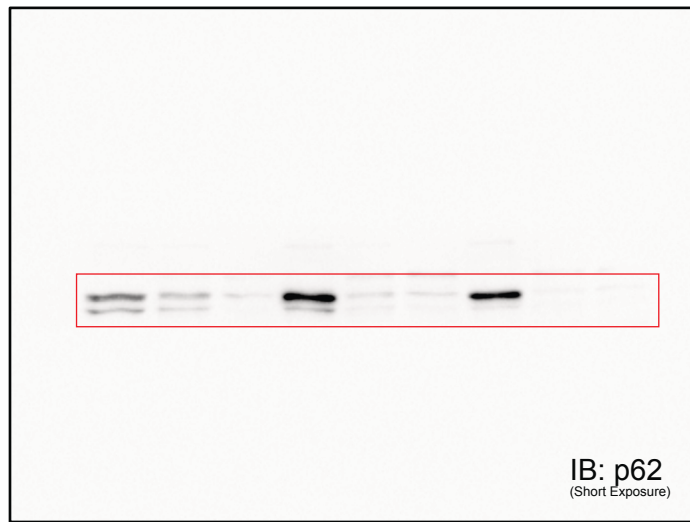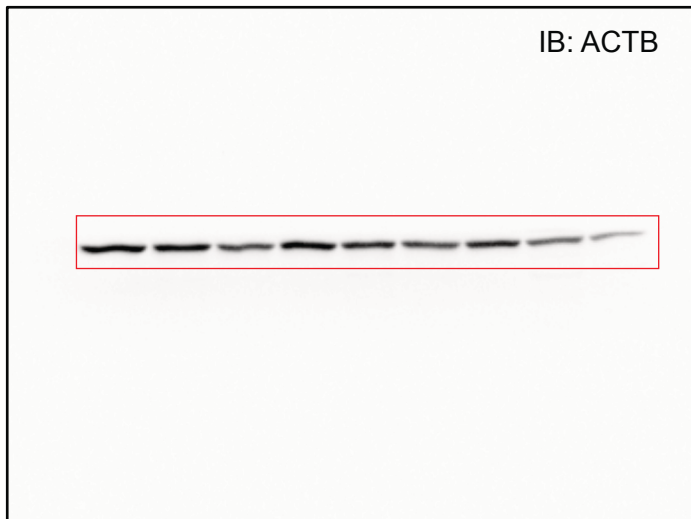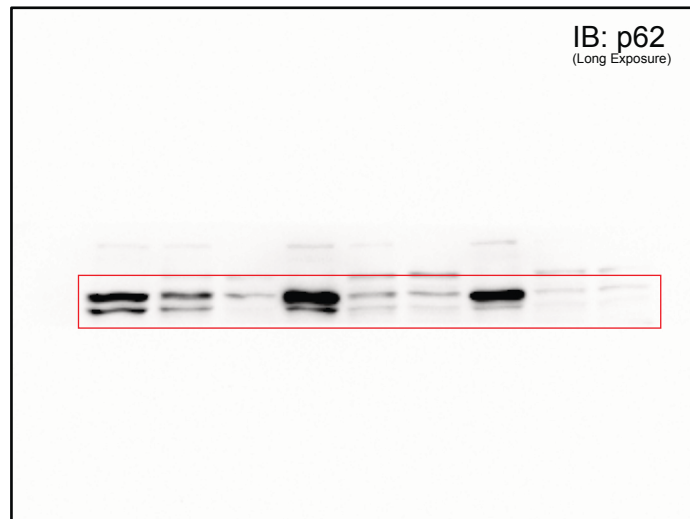

Figure S6B

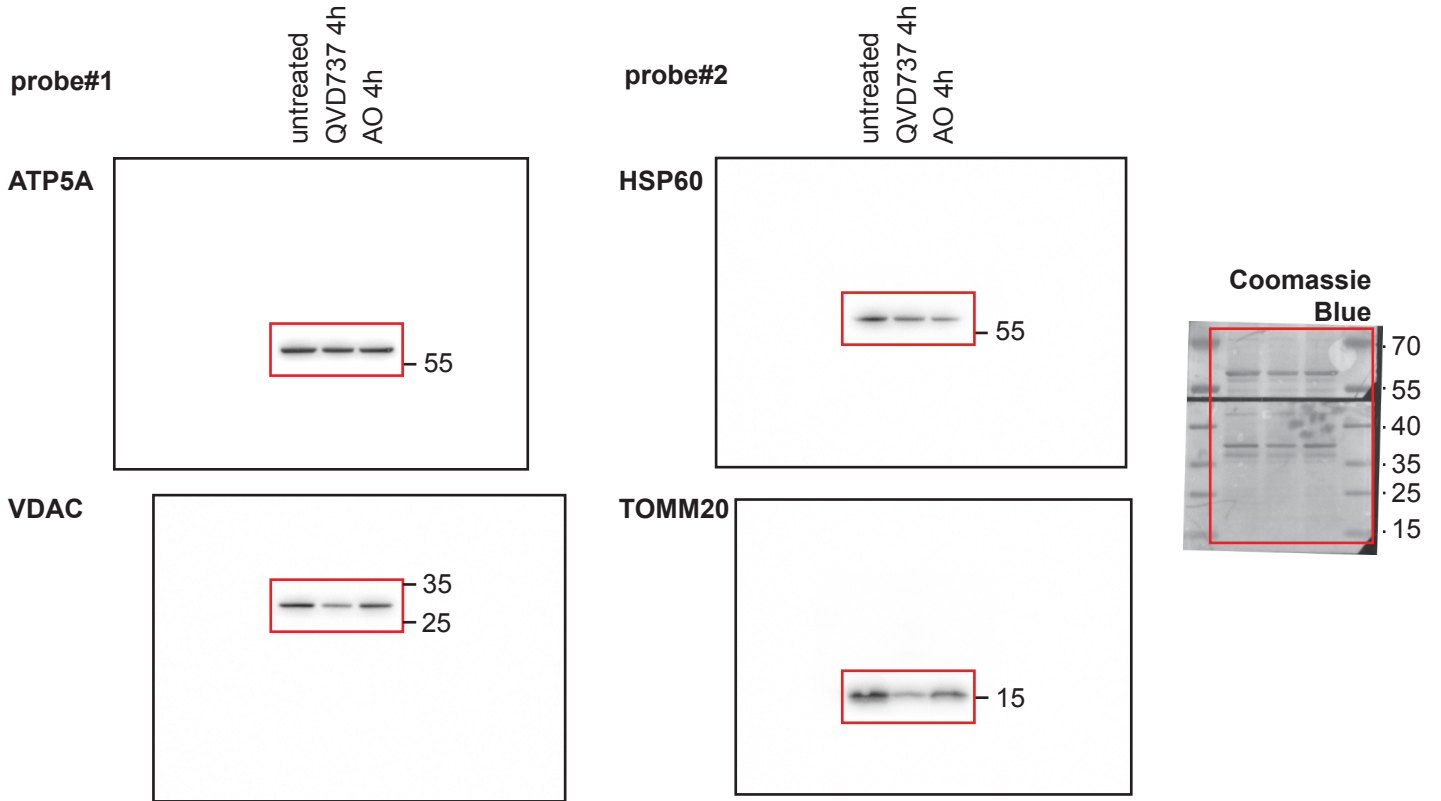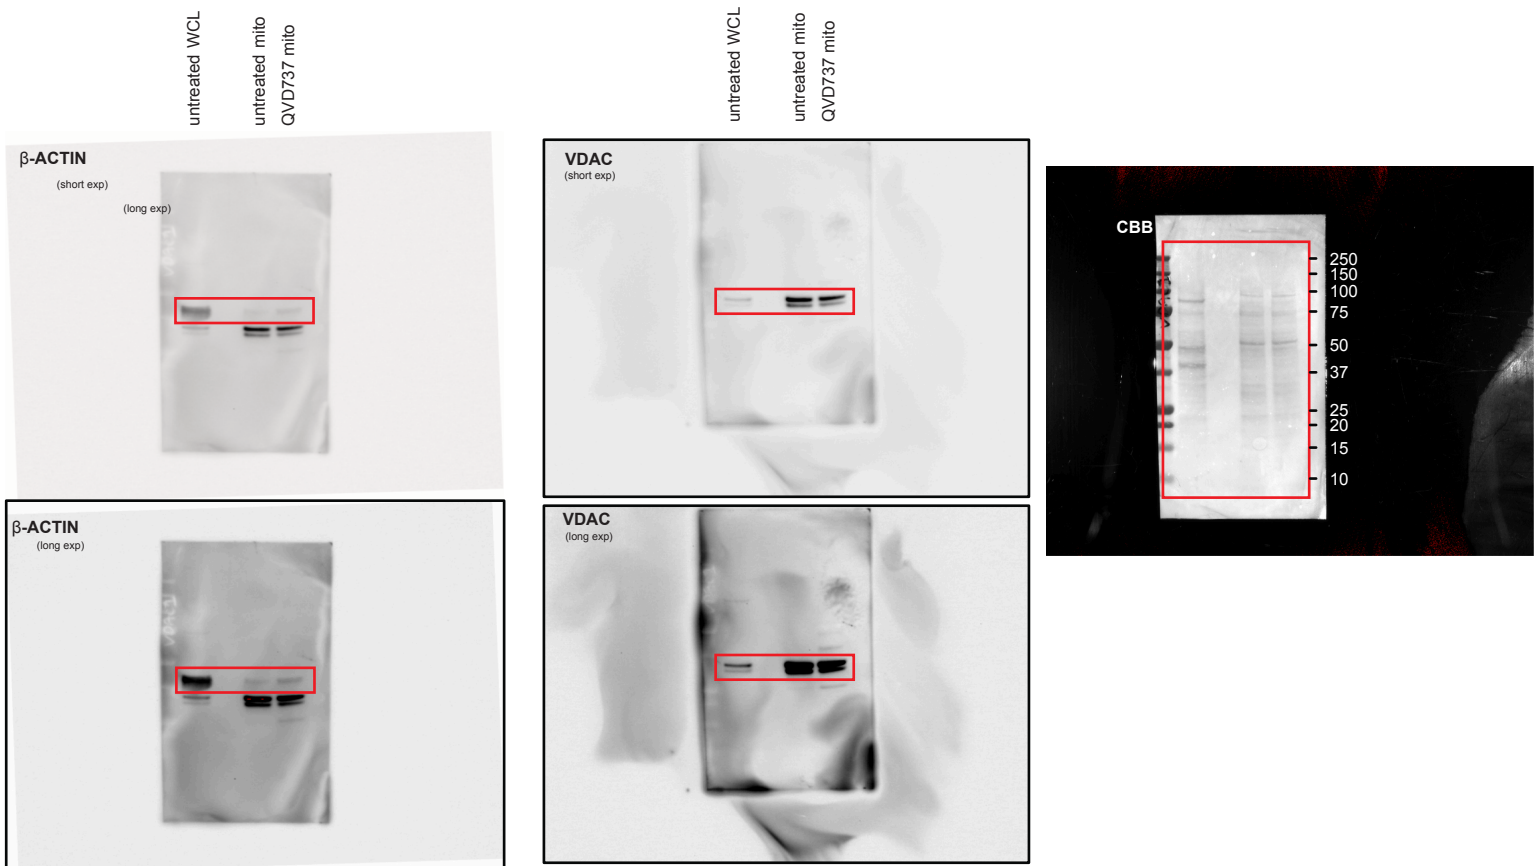

Figure S7B

Wildtype   *Mcl1*<sup>-/-</sup>  
MG132   -   +   -   +

IB: MCL1

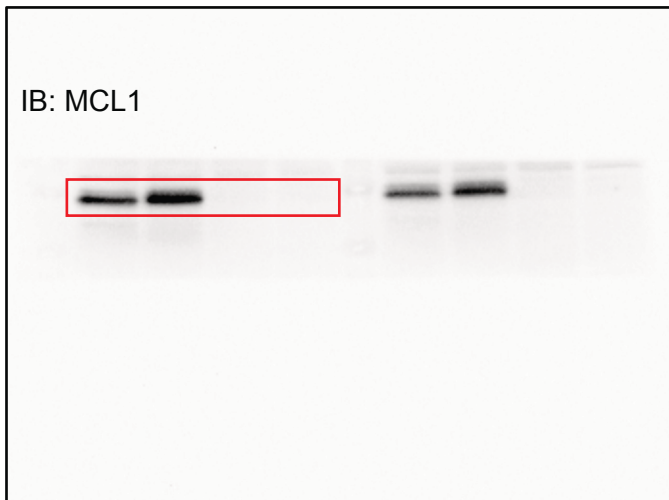

Wildtype   *Mcl1*<sup>-/-</sup>  
MG132   -   +   -   +

IB: HSP60

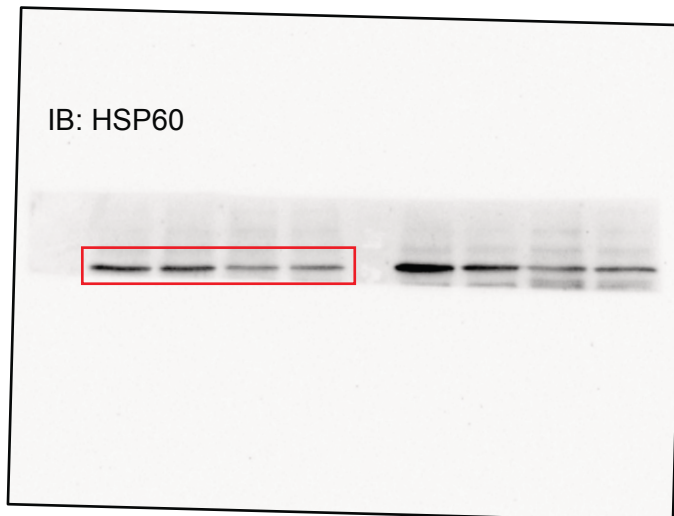

Wildtype   *Mcl1*<sup>-/-</sup>  
MG132   -   +   -   +

IB: Ub (P4D1)

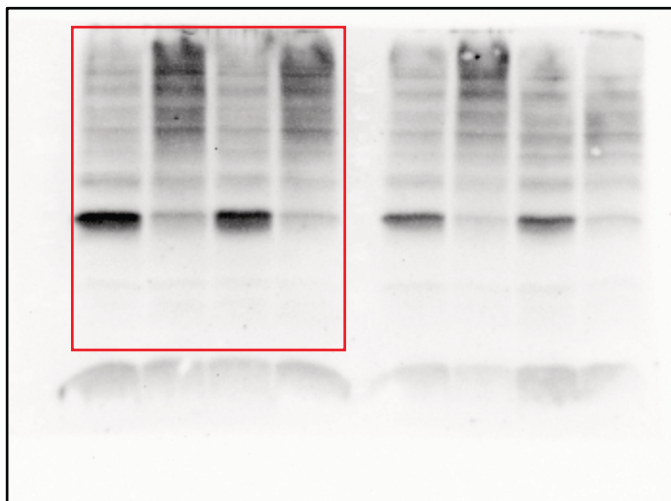

Wildtype   *Mcl1*<sup>-/-</sup>

MG132   -   +   -   +

CBB

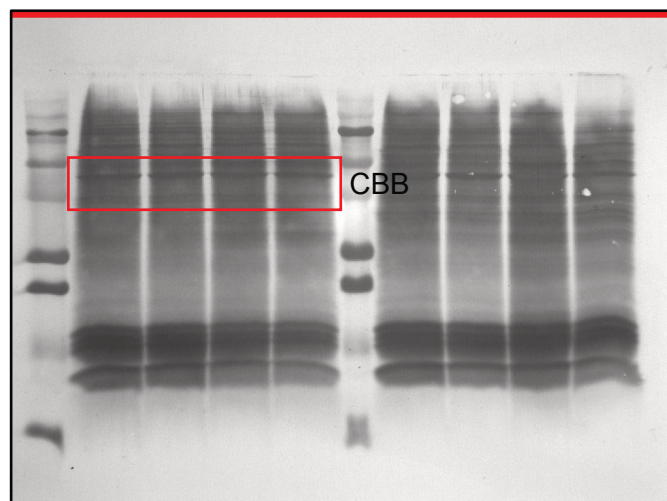



Figure S7D

WT sHeLa  
5KO sHeLa

IB: NDP52

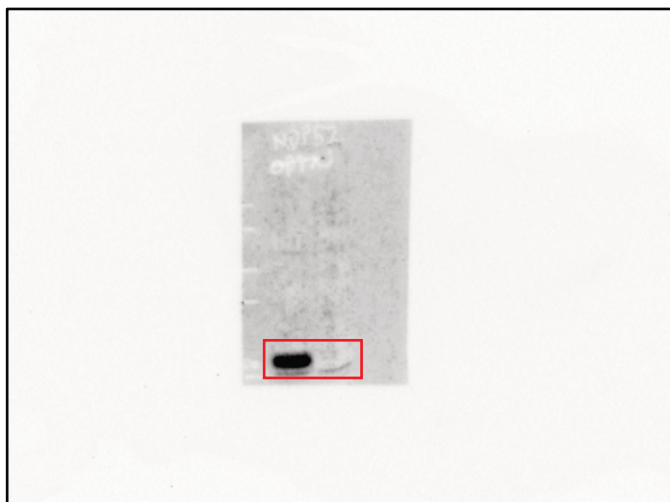

WT sHeLa  
5KO sHeLa

IB: TAX1BP1

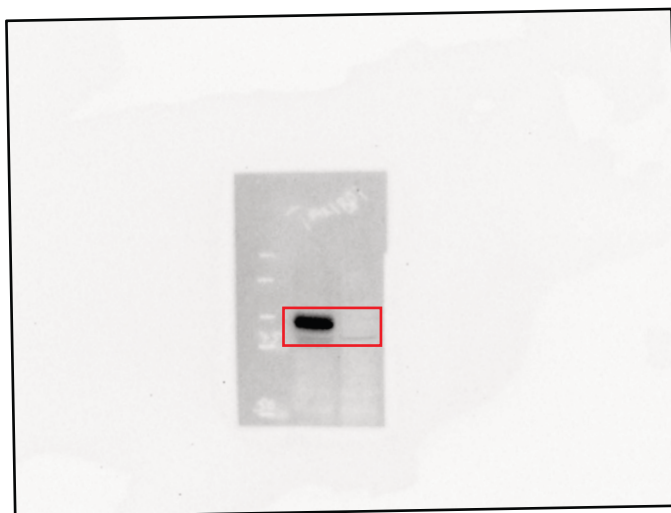

IB: p62

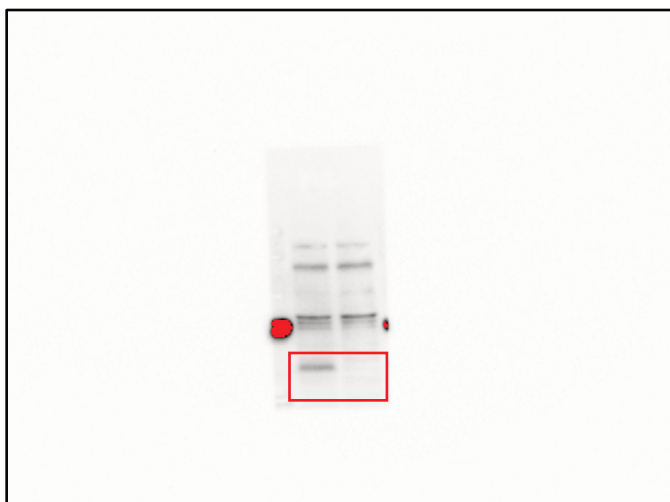

IB: OPTN

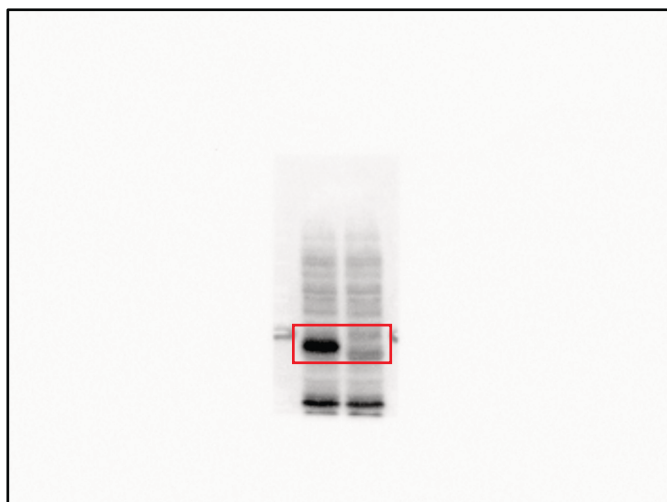

IB: GAPDH

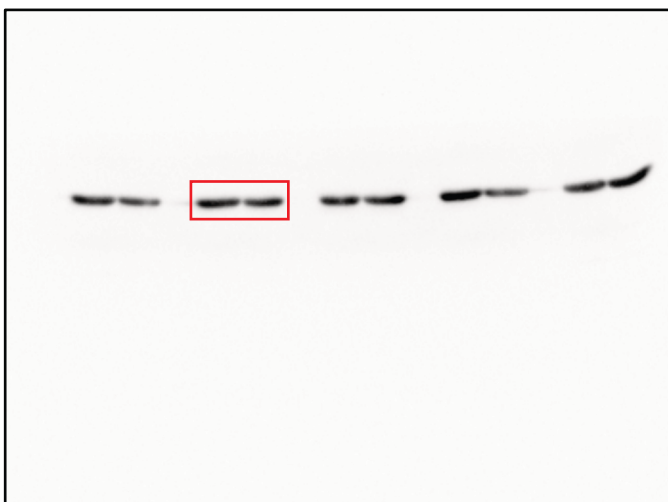

IB: NBR1

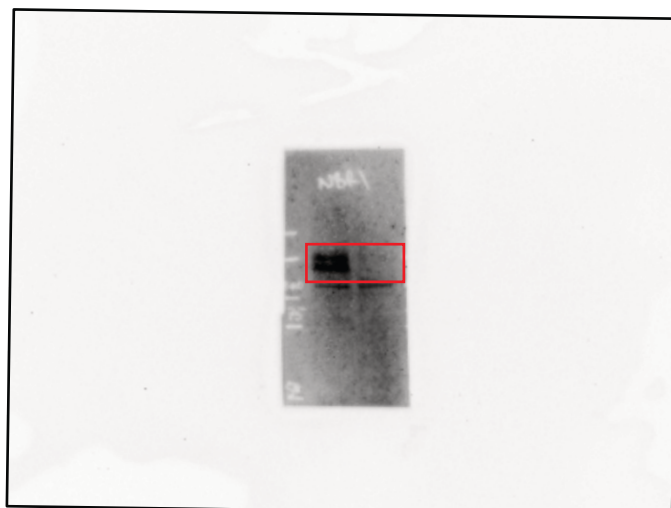

Supplement: 41418_2024_1260_MOESM14_ESM.pdf [file 41418_2024_1260_MOESM14_ESM.pdf]
